# Supplementary material
Source: PubMed Central journal article supplement (PMC7360479)
Supplement: NIHMS1582684-supplement-1.pdf [file NIHMS1582684-supplement-1.pdf]

## Supplementary documents:

Table I – The Child Perceptions Questionnaire subscales for 8 to 10-year-old children (CPQ8–10).

| OHRQoL                           | CPQ <sub>8-10</sub><br>(Over all) | Oral<br>Symptoms | Functional<br>Limitation | Emotional<br>Well-Being | Social<br>Well-Being |
|----------------------------------|-----------------------------------|------------------|--------------------------|-------------------------|----------------------|
| Number of items                  | 25                                | 5                | 5                        | 5                       | 10                   |
| Possible range                   | 0-100                             | 0-20             | 0-20                     | 0-20                    | 0-40                 |
| Observed range                   | 0-43                              | 0-15             | 0-8                      | 0-20                    | 0-13                 |
| Mean (±SD)                       | 9.7 (±8.5)                        | 4.8 (±3.1)       | 1.7 (±2.2)               | 1.8 (±3.5)              | 1.4 (±2.7)           |
| <b>Posterior open-bite</b>       |                                   |                  |                          |                         |                      |
| No – mean (±SD)                  | 9.4 (±9.2)                        | 4.7 (±2.9)       | 1.5 (±2.2)               | 1.8 (±3.9)              | 1.4 (±2.8)           |
| Yes – mean (±SD)                 | 10.8 (±6.5)                       | 5.3 (±3.3)       | 2.5 (±1.9)               | 1.5 (±2.2)              | 1.6 (±2.3)           |
| <b>Anterior open-bite</b>        |                                   |                  |                          |                         |                      |
| No – mean (±SD)                  | 8.8 (±7.9)                        | 4.7 (±1.9)       | 1.5 (±1.8)               | 1.7 (±3.6)              | 1.0 (±2.0)           |
| Yes – mean (±SD)                 | 10.3 (±9.3)                       | 4.9 (±3.1)       | 1.8 (±2.3)               | 2.0 (±3.9)              | 1.6 (±3.1)           |
| Missing – mean (±SD)             | 7.8 (±5.7)                        | 4.5 (±3.5)       | 1.6 (±1.9)               | 0.9 (±0.9)              | 0.8 (±1.0)           |
| <b>Posterior cross-bite (No)</b> |                                   |                  |                          |                         |                      |
| No – mean (±SD)                  | 9.4 (±8.2)                        | 4.7 (±2.9)       | 1.7 (±2.3)               | 1.7 (±2.9)              | 1.2 (±2.3)           |
| Yes – mean (±SD)                 | 10.3 (±9.4)                       | 5.1 (±3.3)       | 1.7 (±2.0)               | 1.8 (±4.4)              | 1.8 (±3.3)           |
| <b>Anterior cross-bite</b>       |                                   |                  |                          |                         |                      |
| No – mean (±SD)                  | 8.6 (±7.5)                        | 4.7 (±3.5)       | 1.5 (±2.2)               | 1.2 (±1.9)              | 1.2 (±2.2)           |
| Yes – mean (±SD)                 | 11.8 (±10.1)                      | 5.1 (±2.2)       | 2.1 (±2.2)               | 2.9 (±5.2)              | 1.8 (±3.4)           |
| <b>Angle's classification</b>    |                                   |                  |                          |                         |                      |
| CI I – mean (±SD)                | 7.5 (±8.3)                        | 4.2 (±3.8)       | 1.5 (±2.2)               | 0.9 (±1.2)              | 0.9 (±2.1)           |
| CI III – mean (±SD)              | 10.8 (±9.5)                       | 4.7 (±2.7)       | 1.9 (±2.4)               | 2.3 (±4.4)              | 1.9 (±3.1)           |
| Other – mean (±SD)               | 9.7 (±4.1)                        | 6.2 (±2.8)       | 1.2 (±1.5)               | 1.4 (±1.8)              | 0.7 (±1.3)           |

Results are shown as n or mean (±SD).

Statistical analysis: Welch's t-test, results have been confirmed by Mann-Whitney U test (non-parametric test).

Table II – The Child Perceptions Questionnaire subscales for 11 to 14-year-old children (CPQ11-14).

| OHRQoL                     | CPQ <sub>11-14</sub><br>(Over all) | Oral<br>Symptoms | Functional<br>Limitation | Emotional<br>Well-Being | Social<br>Well-Being |
|----------------------------|------------------------------------|------------------|--------------------------|-------------------------|----------------------|
| Number of items            | 37                                 | 6                | 9                        | 9                       | 13                   |
| Possible range             | 0-148                              | 0-24             | 0-36                     | 0-36                    | 0-52                 |
| Observed range             | 1-53                               | 1-11             | 0-19                     | 0-20                    | 0-19                 |
| Mean (±SD)                 | 20.2 (±13.8)                       | 6.4 (±3.1)       | 6.1 (±4.9)               | 4.6 (±6.2)              | 3.1 (±4.3)           |
| <b>Posterior open-bite</b> |                                    |                  |                          |                         |                      |
| No – mean (±SD)            | 18.9 (±13.5)                       | 6.2 (±3.1)       | 4.2 (±4.3) *             | 4.4 (±6.1)              | 3.1 (±4.4)           |
| Yes – mean (±SD)           | 23.4 (±14.3)                       | 6.9 (±3.1)       | 8.2 (±5.6) *             | 5.1 (±6.3)              | 3.2 (±4.2)           |

|                            |                      |                    |                    |                  |                  |
|----------------------------|----------------------|--------------------|--------------------|------------------|------------------|
| Anterior open-bite         |                      |                    |                    |                  |                  |
| No – mean ( $\pm$ SD)      | 17.8 ( $\pm$ 10.3)   | 7.0 ( $\pm$ 3.2)   | 7.3 ( $\pm$ 4.9)   | 2.2 ( $\pm$ 1.9) | 1.3 ( $\pm$ 2.3) |
| Yes – mean ( $\pm$ SD)     | 20.1 ( $\pm$ 14.1)   | 6.4 ( $\pm$ 3.2)   | 6.1 ( $\pm$ 5.2)   | 4.7 ( $\pm$ 6.4) | 2.9 ( $\pm$ 3.8) |
| Missing – mean ( $\pm$ SD) | 22.5 ( $\pm$ 14.3)   | 6.2 ( $\pm$ 3.2)   | 5.1 ( $\pm$ 3.3)   | 5.7 ( $\pm$ 6.3) | 5.5 ( $\pm$ 7.1) |
| Posterior cross-bite (No)  |                      |                    |                    |                  |                  |
| No – mean ( $\pm$ SD)      | 15.8 ( $\pm$ 12.4) * | 5.6 ( $\pm$ 3.1) * | 4.6 ( $\pm$ 4.2) * | 3.8 ( $\pm$ 5.9) | 2.8 ( $\pm$ 4.3) |
| Yes – mean ( $\pm$ SD)     | 26.1 ( $\pm$ 12.7) * | 7.9 ( $\pm$ 2.6) * | 8.6 ( $\pm$ 5.0) * | 5.9 ( $\pm$ 6.4) | 3.7 ( $\pm$ 4.3) |
| Anterior cross-bite        |                      |                    |                    |                  |                  |
| No – mean ( $\pm$ SD)      | 18.3 ( $\pm$ 13.9)   | 6.0 ( $\pm$ 3.2)   | 5.3 ( $\pm$ 4.4)   | 3.9 ( $\pm$ 6.1) | 3.1 ( $\pm$ 4.5) |
| Yes – mean ( $\pm$ SD)     | 24 ( $\pm$ 13.2)     | 7.2 ( $\pm$ 2.9)   | 7.5 ( $\pm$ 5.5)   | 5.7 ( $\pm$ 6.1) | 3.2 ( $\pm$ 4.0) |
| Angle's classification     |                      |                    |                    |                  |                  |
| CI I – mean ( $\pm$ SD)    | 16.7 ( $\pm$ 11.8)   | 5.7 ( $\pm$ 2.6)   | 4.4 ( $\pm$ 3.8)   | 3.5 ( $\pm$ 5.4) | 3.1 ( $\pm$ 4.7) |
| CI III – mean ( $\pm$ SD)  | 22.7 ( $\pm$ 14.4)   | 7.1 ( $\pm$ 3.3)   | 7.8 ( $\pm$ 5.5)   | 4.8 ( $\pm$ 6.4) | 3.0 ( $\pm$ 3.9) |
| Other – mean ( $\pm$ SD)   | 21.1 ( $\pm$ 15.5)   | 6.3 ( $\pm$ 3.6)   | 5.0 ( $\pm$ 4.2)   | 6.3 ( $\pm$ 6.8) | 3.5 ( $\pm$ 4.7) |

Results are shown as n or mean ( $\pm$ SD).

Statistical analysis: Welch's t-test, results have been confirmed by Mann-Whitney U test (non-parametric test).

\* Statistically Significant findings at  $p < 0.05$ .
